# Supplementary material for: Genomic diversity and biogeographic distributions of a novel lineage of bacteriophages that infect marine OM43 bacteria
Source: PubMed Central journal article supplement (PMC10580990; doi:10.1128/spectrum.04942-22), 2023-08-21
Supplement: spectrum.04942-22-s0001.pdf [file spectrum.04942-22-s0001.pdf]

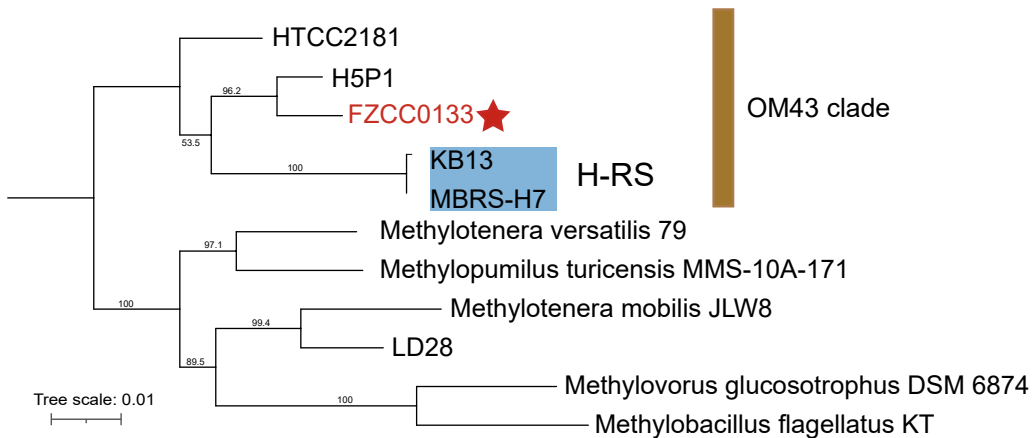

**Supplemental Fig S1** Phylogenetic analysis of OM43 strains and other Methylophilaceae bacteria based on 16S rRNA gene sequences. FZCC0133 is indicated with red asterisk.

**Supplementary Table 1. Summary of MEP401-type MVGs.**

| subgr<br>oup | MEP401-type MVGs                                               | GC<br>content | Length<br>(bp) | #<br>ORFs | Source                                     | Depth In<br>Meters | Genome<br>complete<br>ness (%) | completeness_met<br>hod        | Predicted_H<br>ost | Predicted<br>d_Host_<br>Score |
|--------------|----------------------------------------------------------------|---------------|----------------|-----------|--------------------------------------------|--------------------|--------------------------------|--------------------------------|--------------------|-------------------------------|
| I            | IMGVR_UViG_3300025168_000342 <br>3300025168 Ga0209337_1000466  | 32.19%        | 32687          | 46        | Pacific Ocean                              | 10                 | 74.09                          | AAI-based<br>(high-confidence) | OM43_clade         | 0.478                         |
| I            | MEP401                                                         | 34.37%        | 42987          | 64        | Yantai, Bohai Sea,<br>China                | 0                  | 97.4                           | AAI-based<br>(high-confidence) | OM43_clade         | 0.825                         |
| I            | MEP402                                                         | 34.30%        | 43738          | 67        | Oaska Bay, Japan                           | 0                  | 99.08                          | AAI-based<br>(high-confidence) | OM43_clade         | 0.813                         |
| I            | IMGVR_UViG_3300025168_000569 <br>3300025168 Ga0209337_1000737  | 33.66%        | 26318          | 33        | Subarctic Pacific Ocean                    | 10                 | 59.65                          | AAI-based<br>(high-confidence) | OM43_clade         | 0.353                         |
| I            | IMGVR_UViG_3300025137_000073 <br>3300025137 Ga0209336_10000081 | 34.18%        | 43213          | 67        | Subarctic Pacific Ocean                    | 10                 | 97.91                          | AAI-based<br>(high-confidence) | OM43_clade         | 0.743                         |
| I            | IMGVR_UViG_3300025120_000145 <br>3300025120 Ga0209535_1000182  | 34.13%        | 42636          | 66        | Subarctic Pacific Ocean                    | 10                 | 96.6                           | AAI-based<br>(high-confidence) | OM43_clade         | 0.737                         |
| I            | IMGVR_UViG_3300022933_000019 <br>3300022933 Ga0233427_10001280 | 34.05%        | 27809          | 36        | Saanich Inlet, British<br>Columbia, Canada | 100                | 62.96                          | AAI-based<br>(high-confidence) | OM43_clade         | 0.311                         |
| I            | IMGVR_UViG_3300024299_000020 <br>3300024299 Ga0233448_1000461  | 34.27%        | 44316          | 61        | Saanich Inlet, British<br>Columbia, Canada | 150                | 100                            | AAI-based<br>(high-confidence) | OM43_clade         | 0.545                         |
| I            | IMGVR_UViG_3300024256_000002 <br>3300024256 Ga0233446_1000450  | 34.26%        | 44168          | 62        | Saanich Inlet, British<br>Columbia, Canada | 120                | 100                            | AAI-based<br>(high-confidence) | OM43_clade         | 0.545                         |
| I            | IMGVR_UViG_3300024243_000003 <br>3300024243 Ga0233436_1000489  | 34.27%        | 44168          | 62        | Saanich Inlet, British<br>Columbia, Canada | 150                | 100                            | AAI-based<br>(high-confidence) | OM43_clade         | 0.545                         |
| I            | IMGVR_UViG_3300022931_000001 <br>3300022931 Ga0233433_10000462 | 34.27%        | 44168          | 62        | Saanich Inlet, British<br>Columbia, Canada | 100                | 100                            | AAI-based<br>(high-confidence) | OM43_clade         | 0.545                         |
| I            | IMGVR_UViG_3300024258_000036 <br>3300024258 Ga0233440_1000494  | 34.39%        | 45615          | 62        | Saanich Inlet, British<br>Columbia, Canada | 120                | 100                            | AAI-based<br>(high-confidence) | OM43_clade         | 0.545                         |
| I            | IMGVR_UViG_3300024252_000028 <br>3300024252 Ga0233435_1000531  | 34.30%        | 43999          | 60        | Saanich Inlet, British<br>Columbia, Canada | 135                | 99.62                          | AAI-based<br>(high-confidence) | OM43_clade         | 0.545                         |
| I            | IMGVR_UViG_3300024339_000033 <br>3300024339 Ga0233445_1000475  | 34.38%        | 45545          | 62        | Saanich Inlet, British<br>Columbia, Canada | 100                | 100                            | AAI-based<br>(high-confidence) | OM43_clade         | 0.545                         |
| I            | IMGVR_UViG_3300024261_000056 <br>3300024261 Ga0233439_10000765 | 34.27%        | 44692          | 62        | Saanich Inlet, British<br>Columbia, Canada | 100                | 100                            | AAI-based<br>(high-confidence) | OM43_clade         | 0.545                         |
| I            | IMGVR_UViG_3300024324_000003 <br>3300024324 Ga0233443_1000467  | 34.27%        | 44168          | 62        | Saanich Inlet, British<br>Columbia, Canada | 200                | 100                            | AAI-based<br>(high-confidence) | OM43_clade         | 0.545                         |
| I            | IMGVR_UViG_3300024257_000020 <br>3300024257 Ga0233442_1000411  | 34.28%        | 44306          | 61        | Saanich Inlet, British<br>Columbia, Canada | 150                | 100                            | AAI-based<br>(high-confidence) | OM43_clade         | 0.545                         |

|   |                                                                 |        |       |    |                                                                            |     |       |                             |            |       |
|---|-----------------------------------------------------------------|--------|-------|----|----------------------------------------------------------------------------|-----|-------|-----------------------------|------------|-------|
| I | IMGVR_UViG_3300024327_000014 3300024327 Ga0233434_1000496       | 34.29% | 43999 | 60 | Saanich Inlet, British Columbia, Canada                                    | 120 | 99.62 | AAI-based (high-confidence) | OM43_clade | 0.545 |
| I | IMGVR_UViG_3300024336_000015 3300024336 Ga0233447_1000483       | 34.31% | 44689 | 64 | Saanich Inlet, British Columbia, Canada                                    | 135 | 100   | AAI-based (high-confidence) | OM43_clade | 0.545 |
| I | IMGVR_UViG_3300024302_000001 3300024302 Ga0233449_1000537       | 34.27% | 44168 | 62 | Saanich Inlet, British Columbia, Canada                                    | 200 | 100   | AAI-based (high-confidence) | OM43_clade | 0.545 |
| I | Station102_SUR_ALL_assembly_NO DE_628_length_25877_cov_2.854117 | 34.61% | 25877 | 46 | South Pacific Ocean                                                        | 5   | 61.26 | AAI-based (high-confidence) | OM43_clade | 0.285 |
| I | IMGVR_UViG_3300025897_000046 3300025897 Ga0209425_10001150      | 34.94% | 30905 | 40 | North Sea                                                                  | 1   | 68.97 | AAI-based (high-confidence) | OM43_clade | 0.502 |
| I | IMGVR_UViG_3300001348_000073 3300001348 JGI20154J14316_100009   | 34.46% | 25553 | 36 | North Sea                                                                  | 1   | 62.79 | AAI-based (high-confidence) | OM43_clade | 0.271 |
| I | IMGVR_UViG_3300025860_000092 3300025860 Ga0209119_1001486       | 34.33% | 22915 | 30 | North Sea                                                                  | 1   | 56.48 | AAI-based (high-confidence) | OM43_clade | 0.266 |
| I | IMGVR_UViG_3300001347_000027 3300001347 JGI20156J14371_100005   | 34.78% | 31273 | 43 | North Sea                                                                  | 1   | 69.25 | AAI-based (high-confidence) | OM43_clade | 0.5   |
| I | IMGVR_UViG_3300022921_000060 3300022921 Ga0255765_1001150       | 34.69% | 33485 | 46 | Groves Creek Marsh, Skidaway Island,                                       | 0   | 74.78 | AAI-based (high-confidence) | OM43_clade | 0.501 |
| I | IMGVR_UViG_3300020177_000041 3300020177 Ga0181596_10000902      | 34.76% | 30692 | 38 | Groves Creek Marsh, Skidaway Island,                                       | 0   | 68.51 | AAI-based (high-confidence) | OM43_clade | 0.501 |
| I | IMGVR_UViG_3300020191_000046 3300020191 Ga0181604_10000662      | 34.83% | 31596 | 40 | Groves Creek Marsh, Skidaway Island,                                       | 0   | 70.53 | AAI-based (high-confidence) | OM43_clade | 0.501 |
| I | IMGVR_UViG_3300018036_000038 3300018036 Ga0181600_10000418      | 34.69% | 32623 | 44 | Groves Creek Marsh, Skidaway Island,                                       | 0   | 72.85 | AAI-based (high-confidence) | OM43_clade | 0.501 |
| I | IMGVR_UViG_3300020053_000030 3300020053 Ga0181595_10000739      | 34.72% | 36476 | 53 | Groves Creek Marsh, Skidaway Island,                                       | 0   | 82.65 | AAI-based (high-confidence) | OM43_clade | 0.501 |
| I | IMGVR_UViG_3300018041_000033 3300018041 Ga0181601_10000463      | 34.70% | 32663 | 44 | Groves Creek Marsh, Skidaway Island, Georgia                               | 0   | 72.94 | AAI-based (high-confidence) | OM43_clade | 0.501 |
| I | Station23_DCM_ALL_assembly_NO DE_744_length_20427_cov_3.425093  | 31.11% | 20427 | 29 | Mediterranean Sea                                                          | 55  | 50.94 | AAI-based (high-confidence) | OM43_clade | 0.177 |
| I | IMGVR_UViG_3300017757_000020 3300017757 Ga0181420_1000024       | 31.96% | 46479 | 60 | oligotrophic San Pedro Time Series (SPOT) site                             | 5   | 100   | AAI-based (high-confidence) | OM43_clade | 0.462 |
| I | IMGVR_UViG_3300017772_000015 3300017772 Ga0181430_1000035       | 31.94% | 46404 | 61 | oligotrophic San Pedro Time Series (SPOT) site, San Pedro Channel, CA. USA | 5   | 100   | AAI-based (high-confidence) | OM43_clade | 0.462 |

|   |                                                                        |        |       |    |                                                                                                                                                    |     |       |                                      |            |       |
|---|------------------------------------------------------------------------|--------|-------|----|----------------------------------------------------------------------------------------------------------------------------------------------------|-----|-------|--------------------------------------|------------|-------|
| I | Station194_SUR_ALL_assembly_NO<br>DE_975_length_31631_cov_35.55057     | 33.55% | 31631 | 42 | Arctic Ocean                                                                                                                                       | 5   | 77.76 | AAI-based<br>(high-confidence)       | OM43_clade | 0.258 |
| I | Station188_DCM_ALL_assembly_NO<br>DE_1692_length_30884_cov_155.533     | 32.79% | 30884 | 44 | Arctic Ocean                                                                                                                                       | 17  | 73.95 | AAI-based<br>(high-confidence)       | OM43_clade | 0.261 |
| I | Station188_SUR_ALL_assembly_NO<br>DE_2046_length_28441_cov_114.578     | 32.86% | 28441 | 38 | Arctic Ocean                                                                                                                                       | 5   | 66.52 | AAI-based<br>(high-confidence)       | OM43_clade | 0.243 |
| I | Station168_DCM_ALL_assembly_NO<br>DE_1952_length_39344_cov_140.040     | 33.83% | 39344 | 51 | Arctic Ocean                                                                                                                                       | 40  | 89.13 | AAI-based<br>(high-confidence)       | OM43_clade | 0.459 |
| I | Station210_MES_ALL_assembly_NO<br>DE_1866_length_31658_cov_9.70762     | 33.51% | 31658 | 42 | Arctic Ocean                                                                                                                                       | 391 | 71.74 | AAI-based<br>(high-confidence)       | OM43_clade | 0.404 |
| I | Station168_IZZ_ALL_assembly_NOD<br>E_3354_length_27763_cov_214.62371   | 33.23% | 27763 | 37 | Arctic Ocean                                                                                                                                       | NA  | 62.92 | AAI-based<br>(high-confidence)       | OM43_clade | 0.271 |
| I | IMGVR_UViG_3300025889_000545 <br>3300025889 Ga0208644_1000578          | 32.64% | 32123 | 43 | Delaware River/Bay and<br>Chesapeake Bay under<br>freshwater to marine<br>salinity gradient to study<br>organic matter cycling<br>in a time-series | NA  | 75.1  | AAI-based<br>(high-confidence)       | OM43_clade | 0.288 |
| I | IMGVR_UViG_3300021964_000506 <br>3300021964 Ga0222719_10001277         | 33.69% | 24672 | 32 | San Francisco Bay-<br>Delta (SFBD),<br>California, United States                                                                                   | 4   | 59.35 | AAI-based<br>(medium-<br>confidence) | OM43_clade | 0.241 |
| I | IMGVR_UViG_3300000116_000098 <br>3300000116 DelMOSpr2010_c100002       | 33.15% | 32855 | 46 | Delaware Coast                                                                                                                                     | 0   | 72.75 | AAI-based<br>(high-confidence)       | OM43_clade | 0.336 |
| I | IMGVR_UViG_3300021962_000410 <br>3300021962 Ga0222713_10001066         | 33.73% | 31367 | 43 | San Francisco Bay-<br>Delta (SFBD),<br>California, United States                                                                                   | 12  | 69.42 | AAI-based<br>(high-confidence)       | OM43_clade | 0.372 |
| I | IMGVR_UViG_3300000101_000202 <br>3300000101 DelMOSum2010_c10001<br>088 | 37%    | 22299 | 34 | Delaware Coast                                                                                                                                     | 0   | 52.59 | AAI-based<br>(medium-<br>confidence) | NA         | NA    |
| I | IMGVR_UViG_3300027704_000082 <br>3300027704 Ga0209816_1000437          | 33.75% | 33255 | 52 | West Antarctic<br>Peninsula                                                                                                                        | 1   | 73.55 | AAI-based<br>(high-confidence)       | OM43_clade | 0.31  |
| I | Station193_SUR_ALL_assembly_NO<br>DE_727_length_39660_cov_39.38785     | 33.58% | 39660 | 60 | Arctic Ocean                                                                                                                                       | 5   | 87.62 | AAI-based<br>(high-confidence)       | OM43_clade | 0.321 |
| I | IMGVR_UViG_3300021961_000466 <br>3300021961 Ga0222714_10001281         | 35.22% | 28368 | 42 | San Francisco Bay-<br>Delta (SFBD),<br>California, United States                                                                                   | 13  | 62.89 | AAI-based<br>(high-confidence)       | OM43_clade | 0.253 |
| I | IMGVR_UViG_3300018048_000047 <br>3300018048 Ga0181606_10000740         | 35.49% | 27572 | 38 | Groves Creek Marsh,<br>Skidaway Island,                                                                                                            | 0   | 61.1  | AAI-based<br>(high-confidence)       | OM43_clade | 0.252 |

|   |                                                            |        |       |    |                                                            |     |       |                               |            |       |
|---|------------------------------------------------------------|--------|-------|----|------------------------------------------------------------|-----|-------|-------------------------------|------------|-------|
| I | IMGVR_UViG_3300022926_000088 3300022926 Ga0255753_1001477  | 35.20% | 28092 | 49 | Groves Creek Marsh, Skidaway Island,                       | 0   | 67.35 | AAI-based (high-confidence)   | OM43_clade | 0.254 |
| I | IMGVR_UViG_3300025759_000718 3300025759 Ga0208899_1000774  | 35.04% | 23539 | 31 | USA: Delaware Bay                                          | NA  | 52.17 | AAI-based (high-confidence)   | OM43_clade | 0.223 |
| I | IMGVR_UViG_3300025769_000425 3300025769 Ga0208767_1000435  | 35.19% | 34134 | 47 | USA: Delaware Bay                                          | NA  | 75.62 | AAI-based (high-confidence)   | OM43_clade | 0.24  |
| I | IMGVR_UViG_3300025671_000195 3300025671 Ga0208898_1000330  | 35.31% | 36932 | 52 | USA: Delaware Bay                                          | NA  | 81.79 | AAI-based (high-confidence)   | OM43_clade | 0.309 |
| I | IMGVR_UViG_3300022187_000254 3300022187 Ga0196899_1000398  | 34.79% | 23094 | 30 | USA: Delaware Bay                                          | NA  | 52.73 | AAI-based (high-confidence)   | OM43_clade | 0.219 |
| I | IMGVR_UViG_3300025889_000535 3300025889 Ga0208644_1000566  | 35.13% | 32358 | 49 | USA: Delaware Bay                                          | NA  | 71.67 | AAI-based (high-confidence)   | OM43_clade | 0.338 |
| I | IMGVR_UViG_3300025853_000678 3300025853 Ga0208645_1001202  | 34.82% | 23469 | 30 | USA: Delaware Bay                                          | NA  | 55.33 | AAI-based (high-confidence)   | OM43_clade | 0.22  |
| I | IMGVR_UViG_3300021962_000205 3300021962 Ga0222713_10000513 | 32.83% | 43587 | 72 | San Francisco Bay-Delta (SFBD), California, United States  | 12  | 100   | AAI-based (high-confidence)   | OM43_clade | 0.435 |
| I | IMGVR_UViG_3300021960_000006 3300021960 Ga0222715_10000395 | 32.82% | 43390 | 73 | San Francisco Bay-Delta (SFBD), California, United States  | 29  | 100   | AAI-based (high-confidence)   | OM43_clade | 0.424 |
| I | IMGVR_UViG_3300009703_000002 3300009703 Ga0114933_10000499 | 34.78% | 47769 | 65 | Deep subsurface microbial communities from Kolumbo volcano | 495 | 100   | AAI-based (high-confidence)   | OM43_clade | 0.219 |
| I | IMGVR_UViG_3300011013_000002 3300011013 Ga0114934_10000099 | 34.79% | 47769 | 63 | Deep subsurface microbial communities from Kolumbo volcano | 482 | 100   | AAI-based (high-confidence)   | OM43_clade | 0.219 |
| I | IMGVR_UViG_3300031612_000078 3300031612 Ga0308009_10000676 | 36.68% | 23180 | 35 | Antarctic Ocean                                            | 5   | 52.83 | AAI-based (medium-confidence) | OM43_clade | 0.141 |
| I | IMGVR_UViG_3300031694_000043 3300031694 Ga0308015_10000292 | 36.62% | 24403 | 28 | Antarctic Ocean                                            | 37  | 53.59 | AAI-based (medium-confidence) | OM43_clade | 0.151 |
| I | IMGVR_UViG_3300024261_000113 3300024261 Ga0233439_10001445 | 38.64% | 30295 | 39 | Saanich Inlet, British Columbia, Canada                    | 100 | 66.18 | AAI-based (medium-confidence) | OM43_clade | 0.191 |

|    |                                                                          |        |       |    |                             |     |       |                                      |                      |       |
|----|--------------------------------------------------------------------------|--------|-------|----|-----------------------------|-----|-------|--------------------------------------|----------------------|-------|
| I  | Station180_ZZZ_ALL_assembly_NO<br>DE_2619_length_24406_cov_10.9707<br>20 | 37.22% | 24406 | 27 | Arctic Ocean                | NA  | 54.64 | AAI-based<br>(medium-<br>confidence) | OM43_clade           | 0.155 |
| II | Station209_SUR_ALL_assembly_NO<br>DE_3481_length_22302_cov_43.5754       | 33.04% | 22302 | 35 | Arctic Ocean                | 5   | 59.77 | AAI-based<br>(high-confidence)       | OM43_clade           | 0.225 |
| II | Station206_SUR_ALL_assembly_NO<br>DE_3088_length_18899_cov_3.71969       | 32.97% | 18899 | 29 | Arctic Ocean                | 5   | 50.84 | AAI-based<br>(high-confidence)       | OM43_clade           | 0.179 |
| II | Station201_DCM_ALL_assembly_NO<br>DE_2223_length_23666_cov_9.88916       | 33.35% | 23666 | 36 | Arctic Ocean                | 36  | 62    | AAI-based<br>(high-confidence)       | OM43_clade           | 0.225 |
| II | Station201_SUR_ALL_assembly_NO<br>DE_2148_length_24684_cov_6.57188       | 32.89% | 24684 | 39 | Arctic Ocean                | 5   | 62.44 | AAI-based<br>(high-confidence)       | OM43_clade           | 0.225 |
| II | Station206_MES_ALL_assembly_NO<br>DE_2859_length_27141_cov_15.4362       | 33.19% | 27141 | 42 | Arctic Ocean                | 411 | 68.65 | AAI-based<br>(high-confidence)       | OM43_clade           | 0.225 |
| II | Station208_SUR_ALL_assembly_NO<br>DE_1344_length_27476_cov_10.2722       | 33.19% | 27476 | 44 | Arctic Ocean                | 5   | 69.46 | AAI-based<br>(high-confidence)       | OM43_clade           | 0.228 |
| II | IMGVR_UViG_3300001450_000204 <br>3300001450JGI24006J15134_100003         | 32.94% | 27650 | 42 | Subarctic Pacific Ocean     | 10  | 69.33 | AAI-based<br>(high-confidence)       | OM43_clade           | 0.231 |
| II | IMGVR_UViG_3300025168_000229 <br>3300025168 Ga0209337_1000319            | 33.51% | 37720 | 52 | Subarctic Pacific Ocean     | 10  | 100   | AAI-based<br>(high-confidence)       | OM43_clade           | 0.2   |
| II | Station209_SUR_ALL_assembly_NO<br>DE_3251_length_23277_cov_117.626       | 34.58% | 23277 | 36 | Arctic Ocean                | 5   | 62.45 | AAI-based<br>(high-confidence)       | Methylophil<br>aceae | NA    |
| II | Station82_SUR_COMBINED_FINAL<br>_NODE_1640_length_21266_cov_4.2<br>34360 | 33.64% | 21266 | 31 | South Atlantic Ocean        | 5   | 57.52 | AAI-based<br>(high-confidence)       | NA                   | NA    |
| II | Station194_DCM_ALL_assembly_NO<br>DE_1131_length_35573_cov_8.73053       | 32.45% | 35573 | 55 | Arctic Ocean                | 35  | 100   | AAI-based<br>(high-confidence)       | OM43_clade           | 0.166 |
| II | DTR_891301                                                               | 32.44% | 35518 | 55 | NA                          |     | 100   | AAI-based<br>(high-confidence)       | OM43_clade           | 0.166 |
| II | Station173_DCM_ALL_assembly_NO<br>DE_2308_length_35401_cov_5.84510       | 34.57% | 35401 | 53 | Arctic Ocean                | 35  | 98.36 | AAI-based<br>(high-confidence)       | OM43_clade           | 0.192 |
| II | IMGVR_UViG_3300027668_000056 <br>3300027668 Ga0209482_1000527            | 34.16% | 32646 | 48 | West Antarctic<br>Peninsula | 1   | 90.7  | AAI-based<br>(high-confidence)       | OM43_clade           | 0.212 |
| II | Station188_SUR_ALL_assembly_NO<br>DE_1877_length_30316_cov_138.806       | 34.97% | 30316 | 43 | Arctic Ocean                | 5   | 84.79 | AAI-based<br>(high-confidence)       | OM43_clade           | 0.189 |
| II | Station158_DCM_ALL_assembly_NO<br>DE_1718_length_36818_cov_7.16396       | 35.49% | 36818 | 53 | Arctic Ocean                | 25  | 99.47 | AAI-based<br>(high-confidence)       | OM43_clade           | NA    |
| II | IMGVR_UViG_3300009512_000084 <br>3300009512 Ga0115003_10001199           | 36.10% | 23006 | 32 | western Arctic Ocean        | 25  | 58.12 | AAI-based<br>(high-confidence)       | OM43_clade           | 0.243 |

|    |                                                                 |        |       |    |                                      |    |       |                               |             |       |
|----|-----------------------------------------------------------------|--------|-------|----|--------------------------------------|----|-------|-------------------------------|-------------|-------|
| II | IMGVR_UViG_3300001450_000447 3300001450 JGI24006J15134_100007   | 32.28% | 20173 | 34 | Pacific Ocean                        | 10 | 56.18 | AAI-based (high-confidence)   | NA          | NA    |
| II | IMGVR_UViG_3300025168_000832 3300025168 Ga0209337_1001091       | 32.30% | 20968 | 35 | Subarctic Pacific Ocean              | 10 | 58.39 | AAI-based (high-confidence)   | OM43_clade  | 0.261 |
| II | IMGVR_UViG_3300000115_000230 3300000115 DelMOSum2011_c10000     | 32.52% | 22281 | 36 | Delaware Coast                       | 0  | 59.7  | AAI-based (high-confidence)   | OM43_clade  | 0.244 |
| II | IMGVR_UViG_3300000101_000203 3300000101 DelMOSum2010_c10001     | 32.51% | 22280 | 36 | Delaware Coast                       | 0  | 59.7  | AAI-based (high-confidence)   | OM43_clade  | 0.242 |
| II | IMGVR_UViG_3300007345_000256 3300007345 Ga0070752_1000752       | 33.29% | 24934 | 45 | USA: Delaware Bay                    | NA | 62.66 | AAI-based (medium-confidence) | OM43_clade  | 0.173 |
| II | IMGVR_UViG_3300022187_000223 3300022187 Ga0196899_1000350       | 33.38% | 24916 | 44 | USA: Delaware Bay                    | NA | 62.67 | AAI-based (medium-confidence) | OM43_clade  | 0.179 |
| II | IMGVR_UViG_3300025853_000568 3300025853 Ga0208645_1001054       | 33.40% | 25724 | 46 | USA: Delaware Bay                    | NA | 64.7  | AAI-based (medium-confidence) | OM43_clade  | 0.179 |
| II | IMGVR_UViG_3300006810_000458 3300006810 Ga0070754_10001132      | 33.54% | 21969 | 36 | USA: Delaware Bay                    | NA | 55.32 | AAI-based (medium-confidence) | OM43_clade  | 0.176 |
| II | IMGVR_UViG_3300025671_000231 3300025671 Ga0208898_1000378       | 33.83% | 35061 | 57 | USA: Delaware Bay                    | NA | 96.05 | AAI-based (high-confidence)   | OM43_clade  | 0.16  |
| II | IMGVR_UViG_3300007542_000201 3300007542 Ga0099846_1000230       | 38.54% | 43449 | 30 | USA: Chesapeake Bay                  | 1  | 57.72 | AAI-based (medium-confidence) | Xanthomona  | 0.352 |
| II | IMGVR_UViG_3300006802_000966 3300006802 Ga0070749_10001118      | 34.03% | 18138 | 30 | USA: Delaware Bay                    | NA | 50.03 | AAI-based (high-confidence)   | Vibrio      | 0.156 |
| II | IMGVR_UViG_3300018048_000066 3300018048 Ga0181606_10001126      | 35.35% | 23211 | 47 | Groves Creek Marsh, Skidaway Island, | 0  | 62.68 | AAI-based (high-confidence)   | NA          | NA    |
| II | IMGVR_UViG_3300025889_000319 3300025889 Ga0208644_1000301       | 35.14% | 38916 | 58 | USA: Delaware Bay                    | NA | 100   | AAI-based (high-confidence)   | OM43_clade  | NA    |
| II | Station206_SUR_ALL_assembly_NO_DE_1246_length_34088_cov_7.50885 | 37.81% | 34088 | 55 | Arctic Ocean                         | 5  | 93.12 | AAI-based (high-confidence)   | Roseobacter | 0.147 |
| II | Station205_SUR_ALL_assembly_NO_DE_886_length_33890_cov_838.4409 | 40.45% | 33890 | 54 | Arctic Ocean                         | 5  | 96.59 | AAI-based (high-confidence)   | Roseobacter | 0.157 |
| II | IMGVR_UViG_3300007346_000254 3300007346 Ga0070753_1000519       | 33.63% | 23655 | 40 | USA: Delaware Bay                    | NA | 63.61 | AAI-based (high-confidence)   | Pseudomona  | 0.15  |

|    |                                                                    |        |       |    |                   |    |       |                                |             |       |
|----|--------------------------------------------------------------------|--------|-------|----|-------------------|----|-------|--------------------------------|-------------|-------|
| II | IMGVR_UViG_3300007344_000296 <br>3300007344 Ga0070745_1000574      | 34.00% | 21923 | 40 | USA: Delaware Bay | NA | 56.52 | AAI-based<br>(high-confidence) | Pseudomonas | 0.151 |
| II | Station180_SUR_ALL_assembly_NO<br>DE_4506_length_23816_cov_3.59054 | 36.62% | 23816 | 36 | Arctic Ocean      | 5  | 64.04 | AAI-based<br>(high-confidence) | Roseobacter | 0.151 |

---



**Supplementary Table 3.** Summary of linear regression analyses of the relative abundance of each MEP401-type phage with environmental parameters.

| Depth (m)              |         |                | Temperature(°C)        |         |                | Salinity(psu)          |         |                | Chlorophyll a, areal concentration (Chlora areal; mg/m2) |         |                |
|------------------------|---------|----------------|------------------------|---------|----------------|------------------------|---------|----------------|----------------------------------------------------------|---------|----------------|
| MEP401-type phages     | p-value | R <sup>2</sup> | MEP401-type phages     | p-value | R <sup>2</sup> | MEP401-type phages     | p-value | R <sup>2</sup> | MEP401-type phages                                       | p-value | R <sup>2</sup> |
| DelMOSpr2010_c10000288 | NA      | NA             | DelMOSpr2010_c10000288 | NA      | NA             | DelMOSpr2010_c10000288 | NA      | NA             | DelMOSpr2010_c10000288                                   | NA      | NA             |
| DelMOSum2010_c10001088 | 0.3063  | 0.0081         | DelMOSum2010_c10001088 | 0.0308  | 0.0362         | DelMOSum2010_c10001088 | 0.0000  | 0.1537         | DelMOSum2010_c10001088                                   | 0.3008  | 0.0085         |
| Ga0114933_10000499     | NA      | NA             | Ga0114933_10000499     | NA      | NA             | Ga0114933_10000499     | NA      | NA             | Ga0114933_10000499                                       | NA      | NA             |
| Ga0114934_10000099     | NA      | NA             | Ga0114934_10000099     | NA      | NA             | Ga0114934_10000099     | NA      | NA             | Ga0114934_10000099                                       | NA      | NA             |
| Ga0181420_1000024      | 0.4048  | 0.0054         | Ga0181420_1000024      | 0.0095  | 0.0518         | Ga0181420_1000024      | 0.0943  | 0.0219         | Ga0181420_1000024                                        | 0.4593  | 0.0044         |
| Ga0181430_1000035      | 0.4021  | 0.0054         | Ga0181430_1000035      | 0.0088  | 0.0529         | Ga0181430_1000035      | 0.0916  | 0.0222         | Ga0181430_1000035                                        | 0.4558  | 0.0044         |
| Ga0181595_10000739     | 0.1905  | 0.0133         | Ga0181595_10000739     | 0.0000  | 0.1662         | Ga0181595_10000739     | 0.0000  | 0.3255         | Ga0181595_10000739                                       | 0.5861  | 0.0024         |
| Ga0181596_10000902     | 0.1554  | 0.0156         | Ga0181596_10000902     | 0.0000  | 0.1879         | Ga0181596_10000902     | 0.0000  | 0.3255         | Ga0181596_10000902                                       | 0.9565  | 0.0000         |
| Ga0181600_10000418     | 0.1713  | 0.0145         | Ga0181600_10000418     | 0.0000  | 0.1783         | Ga0181600_10000418     | 0.0000  | 0.3266         | Ga0181600_10000418                                       | 0.5283  | 0.0032         |
| Ga0181601_10000463     | 0.1715  | 0.0144         | Ga0181601_10000463     | 0.0000  | 0.1784         | Ga0181601_10000463     | 0.0000  | 0.3266         | Ga0181601_10000463                                       | 0.5290  | 0.0032         |
| Ga0181604_10000662     | 0.1511  | 0.0159         | Ga0181604_10000662     | 0.0000  | 0.1907         | Ga0181604_10000662     | 0.0000  | 0.3333         | Ga0181604_10000662                                       | 0.9377  | 0.0000         |
| Ga0181606_10000740     | NA      | NA             | Ga0181606_10000740     | NA      | NA             | Ga0181606_10000740     | NA      | NA             | Ga0181606_10000740                                       | NA      | NA             |
| Ga0196899_1000398      | NA      | NA             | Ga0196899_1000398      | NA      | NA             | Ga0196899_1000398      | NA      | NA             | Ga0196899_1000398                                        | NA      | NA             |
| Ga0208644_1000566      | NA      | NA             | Ga0208644_1000566      | NA      | NA             | Ga0208644_1000566      | NA      | NA             | Ga0208644_1000566                                        | NA      | NA             |

|                    |        |        |                    |        |        |                    |        |        |                    |        |        |
|--------------------|--------|--------|--------------------|--------|--------|--------------------|--------|--------|--------------------|--------|--------|
| Ga0208644_1000578  | NA     | NA     | Ga0208644_1000578  | NA     | NA     | Ga0208644_1000578  | NA     | NA     | Ga0208644_1000578  | NA     | NA     |
| Ga0208645_1001202  | NA     | NA     | Ga0208645_1001202  | NA     | NA     | Ga0208645_1001202  | NA     | NA     | Ga0208645_1001202  | NA     | NA     |
| Ga0208767_1000435  | NA     | NA     | Ga0208767_1000435  | NA     | NA     | Ga0208767_1000435  | NA     | NA     | Ga0208767_1000435  | NA     | NA     |
| Ga0208898_1000330  | NA     | NA     | Ga0208898_1000330  | NA     | NA     | Ga0208898_1000330  | NA     | NA     | Ga0208898_1000330  | NA     | NA     |
| Ga0208899_1000774  | NA     | NA     | Ga0208899_1000774  | NA     | NA     | Ga0208899_1000774  | NA     | NA     | Ga0208899_1000774  | NA     | NA     |
| Ga0209119_1001486  | 0.2139 | 0.0120 | Ga0209119_1001486  | 0.0000 | 0.1513 | Ga0209119_1001486  | 0.0000 | 0.3294 | Ga0209119_1001486  | 0.2849 | 0.0091 |
| Ga0209336_10000081 | 0.1903 | 0.0133 | Ga0209336_10000081 | 0.0000 | 0.2786 | Ga0209336_10000081 | 0.0000 | 0.1967 | Ga0209336_10000081 | 0.2602 | 0.0100 |
| Ga0209337_1000466  | 0.5237 | 0.0032 | Ga0209337_1000466  | 0.0001 | 0.1171 | Ga0209337_1000466  | 0.0028 | 0.0679 | Ga0209337_1000466  | 0.0465 | 0.0311 |
| Ga0209337_1000737  | 0.1895 | 0.0133 | Ga0209337_1000737  | 0.0000 | 0.2799 | Ga0209337_1000737  | 0.0000 | 0.1873 | Ga0209337_1000737  | 0.2346 | 0.0112 |
| Ga0209425_10001150 | 0.1704 | 0.0145 | Ga0209425_10001150 | 0.0000 | 0.1834 | Ga0209425_10001150 | 0.0000 | 0.3320 | Ga0209425_10001150 | 0.5152 | 0.0034 |
| Ga0209535_1000182  | 0.1900 | 0.0133 | Ga0209535_1000182  | 0.0000 | 0.2791 | Ga0209535_1000182  | 0.0000 | 0.1965 | Ga0209535_1000182  | 0.2562 | 0.0102 |
| Ga0209816_1000437  | 0.0675 | 0.0257 | Ga0209816_1000437  | 0.0000 | 0.2723 | Ga0209816_1000437  | 0.0000 | 0.2192 | Ga0209816_1000437  | 0.1355 | 0.0176 |
| Ga0222713_10000513 | NA     | NA     | Ga0222713_10000513 | NA     | NA     | Ga0222713_10000513 | NA     | NA     | Ga0222713_10000513 | NA     | NA     |
| Ga0222713_10001066 | NA     | NA     | Ga0222713_10001066 | NA     | NA     | Ga0222713_10001066 | NA     | NA     | Ga0222713_10001066 | NA     | NA     |
| Ga0222714_10001281 | NA     | NA     | Ga0222714_10001281 | NA     | NA     | Ga0222714_10001281 | NA     | NA     | Ga0222714_10001281 | NA     | NA     |
| Ga0222715_10000395 | NA     | NA     | Ga0222715_10000395 | NA     | NA     | Ga0222715_10000395 | NA     | NA     | Ga0222715_10000395 | NA     | NA     |
| Ga0222719_10001277 | NA     | NA     | Ga0222719_10001277 | NA     | NA     | Ga0222719_10001277 | NA     | NA     | Ga0222719_10001277 | NA     | NA     |
| Ga0233427_10001280 | 0.1903 | 0.0133 | Ga0233427_10001280 | 0.0000 | 0.2873 | Ga0233427_10001280 | 0.0000 | 0.1833 | Ga0233427_10001280 | 0.2108 | 0.0124 |

|                    |        |        |                    |        |        |                    |        |        |                    |        |        |
|--------------------|--------|--------|--------------------|--------|--------|--------------------|--------|--------|--------------------|--------|--------|
| Ga0233433_10000462 | 0.2068 | 0.0123 | Ga0233433_10000462 | 0.0000 | 0.2726 | Ga0233433_10000462 | 0.0000 | 0.1836 | Ga0233433_10000462 | 0.2398 | 0.0110 |
| Ga0233434_1000496  | 0.2067 | 0.0123 | Ga0233434_1000496  | 0.0000 | 0.2728 | Ga0233434_1000496  | 0.0000 | 0.1836 | Ga0233434_1000496  | 0.2390 | 0.0110 |
| Ga0233435_1000531  | 0.2068 | 0.0123 | Ga0233435_1000531  | 0.0000 | 0.2728 | Ga0233435_1000531  | 0.0000 | 0.1837 | Ga0233435_1000531  | 0.2391 | 0.0110 |
| Ga0233436_1000489  | 0.2082 | 0.0123 | Ga0233436_1000489  | 0.0000 | 0.2721 | Ga0233436_1000489  | 0.0000 | 0.1832 | Ga0233436_1000489  | 0.2410 | 0.0109 |
| Ga0233439_10000765 | 0.2065 | 0.0123 | Ga0233439_10000765 | 0.0000 | 0.2719 | Ga0233439_10000765 | 0.0000 | 0.1842 | Ga0233439_10000765 | 0.2461 | 0.0107 |
| Ga0233439_10001445 | 0.9416 | 0.0000 | Ga0233439_10001445 | 0.0000 | 0.1822 | Ga0233439_10001445 | 0.0110 | 0.0498 | Ga0233439_10001445 | 0.0169 | 0.0444 |
| Ga0233440_1000494  | 0.2062 | 0.0124 | Ga0233440_1000494  | 0.0000 | 0.2738 | Ga0233440_1000494  | 0.0000 | 0.1873 | Ga0233440_1000494  | 0.2440 | 0.0108 |
| Ga0233442_1000411  | 0.2068 | 0.0123 | Ga0233442_1000411  | 0.0000 | 0.2728 | Ga0233442_1000411  | 0.0000 | 0.1836 | Ga0233442_1000411  | 0.2390 | 0.0110 |
| Ga0233443_1000467  | 0.2083 | 0.0122 | Ga0233443_1000467  | 0.0000 | 0.2722 | Ga0233443_1000467  | 0.0000 | 0.1834 | Ga0233443_1000467  | 0.2410 | 0.0109 |
| Ga0233445_1000475  | 0.2072 | 0.0123 | Ga0233445_1000475  | 0.0000 | 0.2729 | Ga0233445_1000475  | 0.0000 | 0.1868 | Ga0233445_1000475  | 0.2461 | 0.0107 |
| Ga0233446_1000450  | 0.2082 | 0.0123 | Ga0233446_1000450  | 0.0000 | 0.2720 | Ga0233446_1000450  | 0.0000 | 0.1831 | Ga0233446_1000450  | 0.2410 | 0.0109 |
| Ga0233447_1000483  | 0.2094 | 0.0122 | Ga0233447_1000483  | 0.0000 | 0.2716 | Ga0233447_1000483  | 0.0000 | 0.1831 | Ga0233447_1000483  | 0.2420 | 0.0108 |
| Ga0233448_1000461  | 0.2084 | 0.0122 | Ga0233448_1000461  | 0.0000 | 0.2720 | Ga0233448_1000461  | 0.0000 | 0.1830 | Ga0233448_1000461  | 0.2406 | 0.0109 |
| Ga0233449_1000537  | 0.2083 | 0.0122 | Ga0233449_1000537  | 0.0000 | 0.2720 | Ga0233449_1000537  | 0.0000 | 0.1832 | Ga0233449_1000537  | 0.2415 | 0.0109 |
| Ga0255753_1001477  | NA     | NA     | Ga0255753_1001477  | NA     | NA     | Ga0255753_1001477  | NA     | NA     | Ga0255753_1001477  | NA     | NA     |
| Ga0255765_1001150  | 0.1703 | 0.0145 | Ga0255765_1001150  | 0.0000 | 0.1785 | Ga0255765_1001150  | 0.0000 | 0.3300 | Ga0255765_1001150  | 0.5199 | 0.0033 |
| Ga0308009_10000676 | 0.9328 | 0.0001 | Ga0308009_10000676 | 0.0000 | 0.2070 | Ga0308009_10000676 | 0.0023 | 0.0710 | Ga0308009_10000676 | 0.0073 | 0.0558 |
| Ga0308015_10000292 | 0.9092 | 0.0001 | Ga0308015_10000292 | 0.0000 | 0.1989 | Ga0308015_10000292 | 0.0036 | 0.0647 | Ga0308015_10000292 | 0.0133 | 0.0476 |

|                                                                               |        |        |                                                                               |        |        |                                                                               |        |        |                                                                               |        |        |
|-------------------------------------------------------------------------------|--------|--------|-------------------------------------------------------------------------------|--------|--------|-------------------------------------------------------------------------------|--------|--------|-------------------------------------------------------------------------------|--------|--------|
| JGI20154J14316_1000<br>0991                                                   | 0.2058 | 0.0124 | JGI20154J14316_100<br>00991                                                   | 0.0000 | 0.1510 | JGI20154J14316_1000<br>0991                                                   | 0.0000 | 0.3307 | JGI20154J14316_1000<br>0991                                                   | 0.2806 | 0.0092 |
| JGI20156J14371_1000<br>0598                                                   | 0.1721 | 0.0144 | JGI20156J14371_100<br>00598                                                   | 0.0000 | 0.1818 | JGI20156J14371_1000<br>0598                                                   | 0.0000 | 0.3265 | JGI20156J14371_1000<br>0598                                                   | 0.5263 | 0.0032 |
| MEP401                                                                        | 0.1892 | 0.0133 | MEP401                                                                        | 0.0000 | 0.2760 | MEP401                                                                        | 0.0000 | 0.2058 | MEP401                                                                        | 0.3452 | 0.0071 |
| MEP402                                                                        | 0.2016 | 0.0126 | MEP402                                                                        | 0.0000 | 0.2585 | MEP402                                                                        | 0.0000 | 0.1750 | MEP402                                                                        | 0.2370 | 0.0111 |
| Station102_SUR_ALL<br>_assembly_NODE_62<br>8_length_25877_cov_<br>2.854117    | 0.4615 | 0.0042 | Station102_SUR_ALL<br>_assembly_NODE_62<br>8_length_25877_cov_<br>2.854117    | 0.0033 | 0.0658 | Station102_SUR_ALL<br>_assembly_NODE_62<br>8_length_25877_cov_<br>2.854117    | 0.0047 | 0.0611 | Station102_SUR_ALL<br>_assembly_NODE_628<br>_length_25877_cov_2.<br>854117    | 0.6248 | 0.0019 |
| Station168_DCM_AL<br>L_assembly_NODE_1<br>952_length_39344_co<br>v_140.040469 | 0.1679 | 0.0147 | Station168_DCM_AL<br>L_assembly_NODE_1<br>952_length_39344_co<br>v_140.040469 | 0.0000 | 0.3214 | Station168_DCM_AL<br>L_assembly_NODE_1<br>952_length_39344_co<br>v_140.040469 | 0.0006 | 0.0890 | Station168_DCM_AL<br>L_assembly_NODE_1<br>952_length_39344_cov<br>_140.040469 | 0.0014 | 0.0780 |
| Station168_IZZ_ALL_<br>assembly_NODE_335<br>4_length_27763_cov_<br>214.623719 | 0.1661 | 0.0148 | Station168_IZZ_ALL_<br>assembly_NODE_335<br>4_length_27763_cov_<br>214.623719 | 0.0000 | 0.3144 | Station168_IZZ_ALL_<br>assembly_NODE_335<br>4_length_27763_cov_<br>214.623719 | 0.0008 | 0.0843 | Station168_IZZ_ALL_<br>assembly_NODE_3354<br>_length_27763_cov_21<br>4.623719 | 0.0014 | 0.0778 |
| Station180_ZZZ_ALL<br>_assembly_NODE_26<br>19_length_24406_cov<br>_10.970720  | 0.6426 | 0.0017 | Station180_ZZZ_ALL<br>_assembly_NODE_26<br>19_length_24406_cov<br>_10.970720  | 0.0000 | 0.1809 | Station180_ZZZ_ALL<br>_assembly_NODE_26<br>19_length_24406_cov<br>_10.970720  | 0.0059 | 0.0582 | Station180_ZZZ_ALL<br>_assembly_NODE_261<br>9_length_24406_cov_1<br>0.970720  | 0.0318 | 0.0361 |
| Station188_DCM_AL<br>L_assembly_NODE_1<br>692_length_30884_co<br>v_155.533199 | 0.1569 | 0.0155 | Station188_DCM_AL<br>L_assembly_NODE_1<br>692_length_30884_co<br>v_155.533199 | 0.0000 | 0.3014 | Station188_DCM_AL<br>L_assembly_NODE_1<br>692_length_30884_co<br>v_155.533199 | 0.0017 | 0.0752 | Station188_DCM_AL<br>L_assembly_NODE_1<br>692_length_30884_cov<br>_155.533199 | 0.0015 | 0.0772 |
| Station188_SUR_ALL<br>_assembly_NODE_20<br>46_length_28441_cov<br>_114.578384 | 0.1590 | 0.0153 | Station188_SUR_ALL<br>_assembly_NODE_20<br>46_length_28441_cov<br>_114.578384 | 0.0000 | 0.3084 | Station188_SUR_ALL<br>_assembly_NODE_20<br>46_length_28441_cov<br>_114.578384 | 0.0011 | 0.0811 | Station188_SUR_ALL<br>_assembly_NODE_204<br>6_length_28441_cov_1<br>14.578384 | 0.0018 | 0.0744 |
| Station193_SUR_ALL<br>_assembly_NODE_72<br>7_length_39660_cov_<br>39.387855   | 0.0793 | 0.0237 | Station193_SUR_ALL<br>_assembly_NODE_72<br>7_length_39660_cov_<br>39.387855   | 0.0000 | 0.2409 | Station193_SUR_ALL<br>_assembly_NODE_72<br>7_length_39660_cov_<br>39.387855   | 0.0000 | 0.2637 | Station193_SUR_ALL<br>_assembly_NODE_727<br>_length_39660_cov_39<br>.387855   | 0.2887 | 0.0089 |
| Station194_SUR_ALL<br>_assembly_NODE_97<br>5_length_31631_cov_<br>35.550576   | 0.1279 | 0.0179 | Station194_SUR_ALL<br>_assembly_NODE_97<br>5_length_31631_cov_<br>35.550576   | 0.0000 | 0.3622 | Station194_SUR_ALL<br>_assembly_NODE_97<br>5_length_31631_cov_<br>35.550576   | 0.0000 | 0.1420 | Station194_SUR_ALL<br>_assembly_NODE_975<br>_length_31631_cov_35<br>.550576   | 0.0051 | 0.0605 |
| Station210_MES_ALL<br>_assembly_NODE_18<br>66_length_31658_cov<br>_9.707623   | 0.1633 | 0.0150 | Station210_MES_AL<br>L_assembly_NODE_1<br>866_length_31658_co<br>v_9.707623   | 0.0000 | 0.3188 | Station210_MES_ALL<br>_assembly_NODE_18<br>66_length_31658_cov<br>_9.707623   | 0.0007 | 0.0875 | Station210_MES_ALL<br>_assembly_NODE_186<br>6_length_31658_cov_9<br>.707623   | 0.0015 | 0.0773 |

|                                                                           |        |        |                                                                           |        |        |                                                                           |        |        |                                                                           |        |        |
|---------------------------------------------------------------------------|--------|--------|---------------------------------------------------------------------------|--------|--------|---------------------------------------------------------------------------|--------|--------|---------------------------------------------------------------------------|--------|--------|
| Station23_DCM_ALL<br>_assembly_NODE_74<br>4_length_20427_cov_<br>3.425093 | 0.1748 | 0.0142 | Station23_DCM_ALL<br>_assembly_NODE_74<br>4_length_20427_cov_<br>3.425093 | 0.0000 | 0.2973 | Station23_DCM_ALL<br>_assembly_NODE_74<br>4_length_20427_cov_<br>3.425093 | 0.0005 | 0.0911 | Station23_DCM_ALL<br>_assembly_NODE_744<br>_length_20427_cov_3.<br>425093 | 0.0102 | 0.0512 |
| DelMOSum2010_c100<br>01091                                                | 0.2304 | 0.0111 | DelMOSum2010_c10<br>001091                                                | 0.0000 | 0.1396 | DelMOSum2010_c100<br>01091                                                | 0.0300 | 0.0365 | DelMOSum2010_c100<br>01091                                                | 0.1161 | 0.0195 |
| DelMOSum2011_c100<br>00730                                                | 0.2308 | 0.0111 | DelMOSum2011_c10<br>000730                                                | 0.0000 | 0.1396 | DelMOSum2011_c100<br>00730                                                | 0.0297 | 0.0367 | DelMOSum2011_c100<br>00730                                                | 0.1171 | 0.0194 |
| DTR_891301                                                                | 0.8777 | 0.0002 | DTR_891301                                                                | 0.0007 | 0.0867 | DTR_891301                                                                | 0.0004 | 0.0956 | DTR_891301                                                                | 0.9323 | 0.0001 |
| Ga0070745_1000574                                                         | NA     | NA     | Ga0070745_1000574                                                         | NA     | NA     | Ga0070745_1000574                                                         | NA     | NA     | Ga0070745_1000574                                                         | NA     | NA     |
| Ga0070749_10001118                                                        | NA     | NA     | Ga0070749_10001118                                                        | NA     | NA     | Ga0070749_10001118                                                        | NA     | NA     | Ga0070749_10001118                                                        | NA     | NA     |
| Ga0070752_1000752                                                         | NA     | NA     | Ga0070752_1000752                                                         | NA     | NA     | Ga0070752_1000752                                                         | NA     | NA     | Ga0070752_1000752                                                         | NA     | NA     |
| Ga0070753_1000519                                                         | NA     | NA     | Ga0070753_1000519                                                         | NA     | NA     | Ga0070753_1000519                                                         | NA     | NA     | Ga0070753_1000519                                                         | NA     | NA     |
| Ga0070754_10001132                                                        | NA     | NA     | Ga0070754_10001132                                                        | NA     | NA     | Ga0070754_10001132                                                        | NA     | NA     | Ga0070754_10001132                                                        | NA     | NA     |
| Ga0099846_1000230                                                         | NA     | NA     | Ga0099846_1000230                                                         | NA     | NA     | Ga0099846_1000230                                                         | NA     | NA     | Ga0099846_1000230                                                         | NA     | NA     |
| Ga0115003_10001199                                                        | 0.4075 | 0.0053 | Ga0115003_10001199                                                        | 0.0000 | 0.1480 | Ga0115003_10001199                                                        | 0.0004 | 0.0946 | Ga0115003_10001199                                                        | 0.3289 | 0.0076 |
| Ga0181606_10001126                                                        | NA     | NA     | Ga0181606_10001126                                                        | NA     | NA     | Ga0181606_10001126                                                        | NA     | NA     | Ga0181606_10001126                                                        | NA     | NA     |
| Ga0196899_1000350                                                         | NA     | NA     | Ga0196899_1000350                                                         | NA     | NA     | Ga0196899_1000350                                                         | NA     | NA     | Ga0196899_1000350                                                         | NA     | NA     |
| Ga0208644_1000301                                                         | NA     | NA     | Ga0208644_1000301                                                         | NA     | NA     | Ga0208644_1000301                                                         | NA     | NA     | Ga0208644_1000301                                                         | NA     | NA     |
| Ga0208645_1001054                                                         | NA     | NA     | Ga0208645_1001054                                                         | NA     | NA     | Ga0208645_1001054                                                         | NA     | NA     | Ga0208645_1001054                                                         | NA     | NA     |
| Ga0208898_1000378                                                         | NA     | NA     | Ga0208898_1000378                                                         | NA     | NA     | Ga0208898_1000378                                                         | NA     | NA     | Ga0208898_1000378                                                         | NA     | NA     |
| Ga0209337_1000319                                                         | 0.6467 | 0.0016 | Ga0209337_1000319                                                         | 0.0000 | 0.1884 | Ga0209337_1000319                                                         | 0.0002 | 0.1030 | Ga0209337_1000319                                                         | 0.1596 | 0.0156 |
| Ga0209337_1001091                                                         | 0.5461 | 0.0028 | Ga0209337_1001091                                                         | 0.9129 | 0.0001 | Ga0209337_1001091                                                         | 0.6582 | 0.0015 | Ga0209337_1001091                                                         | 0.2725 | 0.0096 |

|                                                                               |        |        |                                                                               |        |        |                                                                               |        |        |                                                                               |        |        |
|-------------------------------------------------------------------------------|--------|--------|-------------------------------------------------------------------------------|--------|--------|-------------------------------------------------------------------------------|--------|--------|-------------------------------------------------------------------------------|--------|--------|
| Ga0209482_1000527                                                             | 0.0788 | 0.0238 | Ga0209482_1000527                                                             | 0.0000 | 0.2123 | Ga0209482_1000527                                                             | 0.0000 | 0.4694 | Ga0209482_1000527                                                             | 0.7973 | 0.0005 |
| JGI24006J15134_1000376                                                        | 0.7137 | 0.0010 | JGI24006J15134_1000376                                                        | 0.0000 | 0.1519 | JGI24006J15134_1000376                                                        | 0.0004 | 0.0955 | JGI24006J15134_1000376                                                        | 0.5148 | 0.0034 |
| JGI24006J15134_1000703                                                        | 0.6951 | 0.0012 | JGI24006J15134_1000703                                                        | 0.9796 | 0.0000 | JGI24006J15134_1000703                                                        | 0.6606 | 0.0015 | JGI24006J15134_1000703                                                        | 0.3284 | 0.0076 |
| Station158_DCM_AL<br>L_assembly_NODE_1<br>718_length_36818_cov<br>v_7.163969  | 0.3935 | 0.0057 | Station158_DCM_AL<br>L_assembly_NODE_1<br>718_length_36818_cov<br>v_7.163969  | 0.0001 | 0.1105 | Station158_DCM_AL<br>L_assembly_NODE_1<br>718_length_36818_cov<br>v_7.163969  | 0.0008 | 0.0845 | Station158_DCM_AL<br>L_assembly_NODE_1<br>718_length_36818_cov<br>_7.163969   | 0.5161 | 0.0034 |
| Station173_DCM_AL<br>L_assembly_NODE_2<br>308_length_35401_cov<br>v_5.845103  | 0.0792 | 0.0237 | Station173_DCM_AL<br>L_assembly_NODE_2<br>308_length_35401_cov<br>v_5.845103  | 0.0000 | 0.2257 | Station173_DCM_AL<br>L_assembly_NODE_2<br>308_length_35401_cov<br>v_5.845103  | 0.0000 | 0.4552 | Station173_DCM_AL<br>L_assembly_NODE_2<br>308_length_35401_cov<br>_5.845103   | 0.9145 | 0.0001 |
| Station180_SUR_ALL<br>_assembly_NODE_45<br>06_length_23816_cov<br>_3.590548   | 0.4657 | 0.0041 | Station180_SUR_ALL<br>_assembly_NODE_45<br>06_length_23816_cov<br>_3.590548   | 0.1113 | 0.0198 | Station180_SUR_ALL<br>_assembly_NODE_45<br>06_length_23816_cov<br>_3.590548   | 0.0000 | 0.2474 | Station180_SUR_ALL<br>_assembly_NODE_450<br>6_length_23816_cov_3<br>.590548   | 0.3937 | 0.0058 |
| Station188_SUR_ALL<br>_assembly_NODE_18<br>77_length_30316_cov<br>_138.806451 | 0.1544 | 0.0157 | Station188_SUR_ALL<br>_assembly_NODE_18<br>77_length_30316_cov<br>_138.806451 | 0.0000 | 0.3152 | Station188_SUR_ALL<br>_assembly_NODE_18<br>77_length_30316_cov<br>_138.806451 | 0.0000 | 0.1410 | Station188_SUR_ALL<br>_assembly_NODE_187<br>7_length_30316_cov_1<br>38.806451 | 0.1133 | 0.0198 |
| Station194_DCM_AL<br>L_assembly_NODE_1<br>131_length_35573_cov<br>v_8.730531  | 0.8784 | 0.0002 | Station194_DCM_AL<br>L_assembly_NODE_1<br>131_length_35573_cov<br>v_8.730531  | 0.0007 | 0.0868 | Station194_DCM_AL<br>L_assembly_NODE_1<br>131_length_35573_cov<br>v_8.730531  | 0.0004 | 0.0956 | Station194_DCM_AL<br>L_assembly_NODE_1<br>131_length_35573_cov<br>_8.730531   | 0.9322 | 0.0001 |
| Station201_DCM_AL<br>L_assembly_NODE_2<br>223_length_23666_cov<br>v_9.889162  | 0.6103 | 0.0020 | Station201_DCM_AL<br>L_assembly_NODE_2<br>223_length_23666_cov<br>v_9.889162  | 0.0000 | 0.1939 | Station201_DCM_AL<br>L_assembly_NODE_2<br>223_length_23666_cov<br>v_9.889162  | 0.0003 | 0.0994 | Station201_DCM_AL<br>L_assembly_NODE_2<br>223_length_23666_cov<br>_9.889162   | 0.1047 | 0.0208 |
| Station201_SUR_ALL<br>_assembly_NODE_21<br>48_length_24684_cov<br>_6.571887   | 0.6425 | 0.0017 | Station201_SUR_ALL<br>_assembly_NODE_21<br>48_length_24684_cov<br>_6.571887   | 0.0000 | 0.1579 | Station201_SUR_ALL<br>_assembly_NODE_21<br>48_length_24684_cov<br>_6.571887   | 0.0007 | 0.0877 | Station201_SUR_ALL<br>_assembly_NODE_214<br>8_length_24684_cov_6<br>.571887   | 0.2723 | 0.0096 |
| Station205_SUR_ALL<br>_assembly_NODE_88<br>6_length_33890_cov_<br>838.440934  | 0.4778 | 0.0039 | Station205_SUR_ALL<br>_assembly_NODE_88<br>6_length_33890_cov_<br>838.440934  | 0.0225 | 0.0403 | Station205_SUR_ALL<br>_assembly_NODE_88<br>6_length_33890_cov_<br>838.440934  | 0.0247 | 0.0391 | Station205_SUR_ALL<br>_assembly_NODE_886<br>_length_33890_cov_83<br>8.440934  | 0.6824 | 0.0013 |

|                                                                               |        |        |                                                                               |        |        |                                                                               |        |        |                                                                               |        |          |
|-------------------------------------------------------------------------------|--------|--------|-------------------------------------------------------------------------------|--------|--------|-------------------------------------------------------------------------------|--------|--------|-------------------------------------------------------------------------------|--------|----------|
| Station206_MES_ALL<br>_assembly_NODE_28<br>59_length_27141_cov<br>_15.436240  | 0.5630 | 0.0026 | Station206_MES_AL<br>L_assembly_NODE_2<br>859_length_27141_co<br>v_15.436240  | 0.0000 | 0.1794 | Station206_MES_ALL<br>_assembly_NODE_28<br>59_length_27141_cov<br>_15.436240  | 0.0006 | 0.0878 | Station206_MES_ALL<br>_assembly_NODE_285<br>9_length_27141_cov_1<br>5.436240  | 0.0433 | 0.0320   |
| Station206_SUR_ALL<br>_assembly_NODE_12<br>46_length_34088_cov<br>_7.508859   | 0.8843 | 0.0002 | Station206_SUR_ALL<br>_assembly_NODE_12<br>46_length_34088_cov<br>_7.508859   | 0.0176 | 0.0436 | Station206_SUR_ALL<br>_assembly_NODE_12<br>46_length_34088_cov<br>_7.508859   | 0.0392 | 0.0330 | Station206_SUR_ALL<br>_assembly_NODE_124<br>6_length_34088_cov_7<br>.508859   | 0.9841 | 3.17E-06 |
| Station206_SUR_ALL<br>_assembly_NODE_30<br>88_length_18899_cov<br>_3.719699   | 0.7185 | 0.0010 | Station206_SUR_ALL<br>_assembly_NODE_30<br>88_length_18899_cov<br>_3.719699   | 0.0000 | 0.1432 | Station206_SUR_ALL<br>_assembly_NODE_30<br>88_length_18899_cov<br>_3.719699   | 0.0008 | 0.0843 | Station206_SUR_ALL<br>_assembly_NODE_308<br>8_length_18899_cov_3<br>.719699   | 0.5147 | 0.0034   |
| Station208_SUR_ALL<br>_assembly_NODE_13<br>44_length_27476_cov<br>_10.272273  | 0.5996 | 0.0021 | Station208_SUR_ALL<br>_assembly_NODE_13<br>44_length_27476_cov<br>_10.272273  | 0.0000 | 0.1929 | Station208_SUR_ALL<br>_assembly_NODE_13<br>44_length_27476_cov<br>_10.272273  | 0.0002 | 0.1034 | Station208_SUR_ALL<br>_assembly_NODE_134<br>4_length_27476_cov_1<br>0.272273  | 0.0778 | 0.0245   |
| Station209_SUR_ALL<br>_assembly_NODE_32<br>51_length_23277_cov<br>_117.626647 | 0.1503 | 0.0160 | Station209_SUR_ALL<br>_assembly_NODE_32<br>51_length_23277_cov<br>_117.626647 | 0.0000 | 0.3439 | Station209_SUR_ALL<br>_assembly_NODE_32<br>51_length_23277_cov<br>_117.626647 | 0.0001 | 0.1129 | Station209_SUR_ALL<br>_assembly_NODE_325<br>1_length_23277_cov_1<br>17.626647 | 0.0042 | 0.0631   |
| Station209_SUR_ALL<br>_assembly_NODE_34<br>81_length_22302_cov<br>_43.575448  | 0.6905 | 0.0012 | Station209_SUR_ALL<br>_assembly_NODE_34<br>81_length_22302_cov<br>_43.575448  | 0.0000 | 0.1508 | Station209_SUR_ALL<br>_assembly_NODE_34<br>81_length_22302_cov<br>_43.575448  | 0.0004 | 0.0944 | Station209_SUR_ALL<br>_assembly_NODE_348<br>1_length_22302_cov_4<br>3.575448  | 0.4975 | 0.0037   |
| Station82_SUR_COM<br>BINED_FINAL_NOD<br>E_1640_length_21266<br>_cov_4.234360  | 0.6289 | 0.0018 | Station82_SUR_COM<br>BINED_FINAL_NOD<br>E_1640_length_21266<br>_cov_4.234360  | 0.0000 | 0.1770 | Station82_SUR_COM<br>BINED_FINAL_NOD<br>E_1640_length_21266<br>_cov_4.234360  | 0.0004 | 0.0954 | Station82_SUR_COM<br>BINED_FINAL_NOD<br>E_1640_length_21266<br>_cov_4.234360  | 0.1388 | 0.0173   |

Table S4 qPCR primer sequences used in this study

| Primer set | Primer Sequence (5 -3) | GC(%) | Product size (bp) |
|------------|------------------------|-------|-------------------|
| MEP401-F/R | CAAGCTATGCATGGTTGGGT   | 50%   | 132               |
|            | CCTACAAGCACATCGCACTT   | 50%   |                   |
| MEP402-F/R | GCATTGGCTACGCAGGTATG   | 55%   | 104               |
|            | AGGATGGGTAAGCTAGGTCTTG | 50%   |                   |
